# Supplementary material for: Antibacterial Activities of Metabolites from Vitis rotundifolia (Muscadine) Roots against Fish Pathogenic Bacteria
Source: MDPI journal article supplement (doi:10.3390/molecules23112761), 2018-10-25

Kevin K. Schrader<sup>a\*</sup>, Mohamed A. Ibrahim<sup>b,c</sup>, Howaida I. Abd-Alla<sup>b</sup>, Charles L. Cantrell<sup>a</sup>, and David S. Pasco<sup>c</sup>

<sup>a</sup>United States Department of Agriculture, Agricultural Research Service, Natural Products Utilization Research Unit, National Center  
for Natural Products Research, Post Office Box 1848, University, Mississippi, USA

<sup>b</sup>Chemistry of Natural Compounds Department, Pharmaceutical and Drug Industries Division, National Research Centre, Post Office  
Box 12622, Dokki, Giza, Egypt

<sup>c</sup>National Center for Natural Products Research, School of Pharmacy, University of Mississippi, University, Mississippi, USA

\*To whom correspondence should be addressed. Tel: +1 662-915-1144. Fax: +1 662-915-1035. E-mail:

kevin.schrader@ars.usda.gov

## Table of contents:

| Fig. | Title                                                                       | Page |
|------|-----------------------------------------------------------------------------|------|
| SI 1 | $^1\text{H}$ NMR spectrum of (+)-Ampelopsin A [ $\text{CD}_3\text{OD}$ ]    | 4    |
| SI 2 | $^{13}\text{C}$ NMR spectrum of (+)-Ampelopsin A [ $\text{CD}_3\text{OD}$ ] | 5    |
| SI 3 | $^1\text{H}$ NMR spectrum of (+)-Hopeaphenol [ $\text{CD}_3\text{OD}$ ]     | 6    |
| SI 4 | $^{13}\text{C}$ NMR spectrum of (+)-Hopeaphenol [ $\text{CD}_3\text{OD}$ ]  | 7    |
| SI 5 | $^1\text{H}$ NMR spectrum of (+)-Vitisin A [ $\text{CD}_3\text{OD}$ ]       | 8    |
| SI 6 | $^{13}\text{C}$ NMR spectrum of (+)-Vitisin A [ $\text{CD}_3\text{OD}$ ]    | 9    |
| SI 7 | $^1\text{H}$ NMR spectrum of (+)-Vitisin B [ $\text{CD}_3\text{OD}$ ]       | 10   |
| SI 8 | $^{13}\text{C}$ NMR spectrum of (+)-Vitisin B [ $\text{CD}_3\text{OD}$ ]    | 11   |

proton

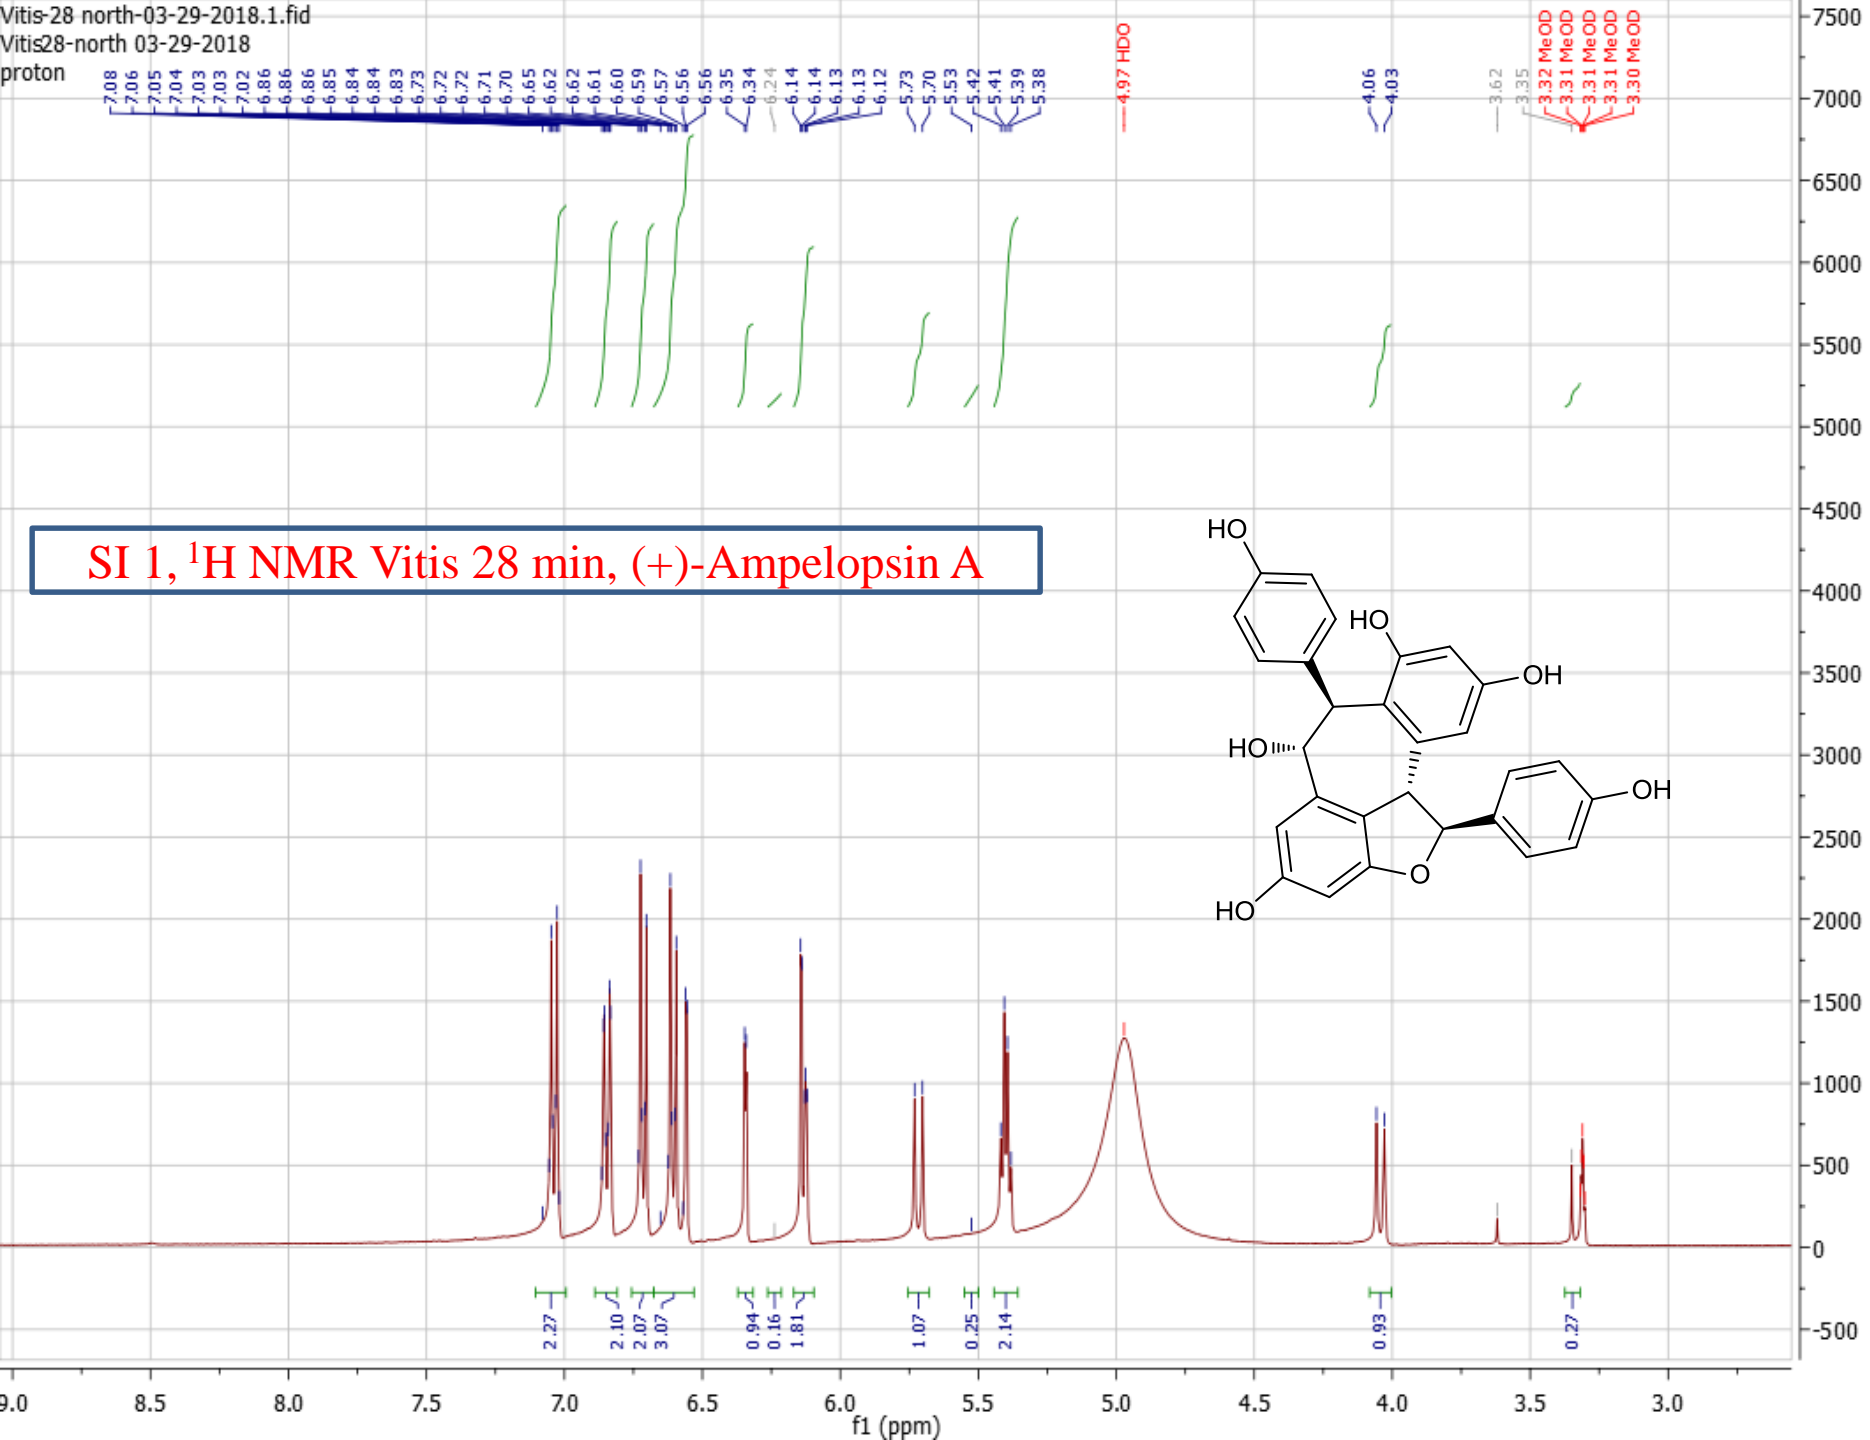

SI 2,  $^{13}\text{C}$  NMR Vitis 28 min, (+)-Ampelopsin A

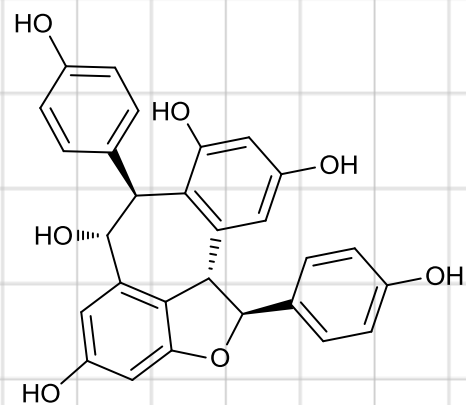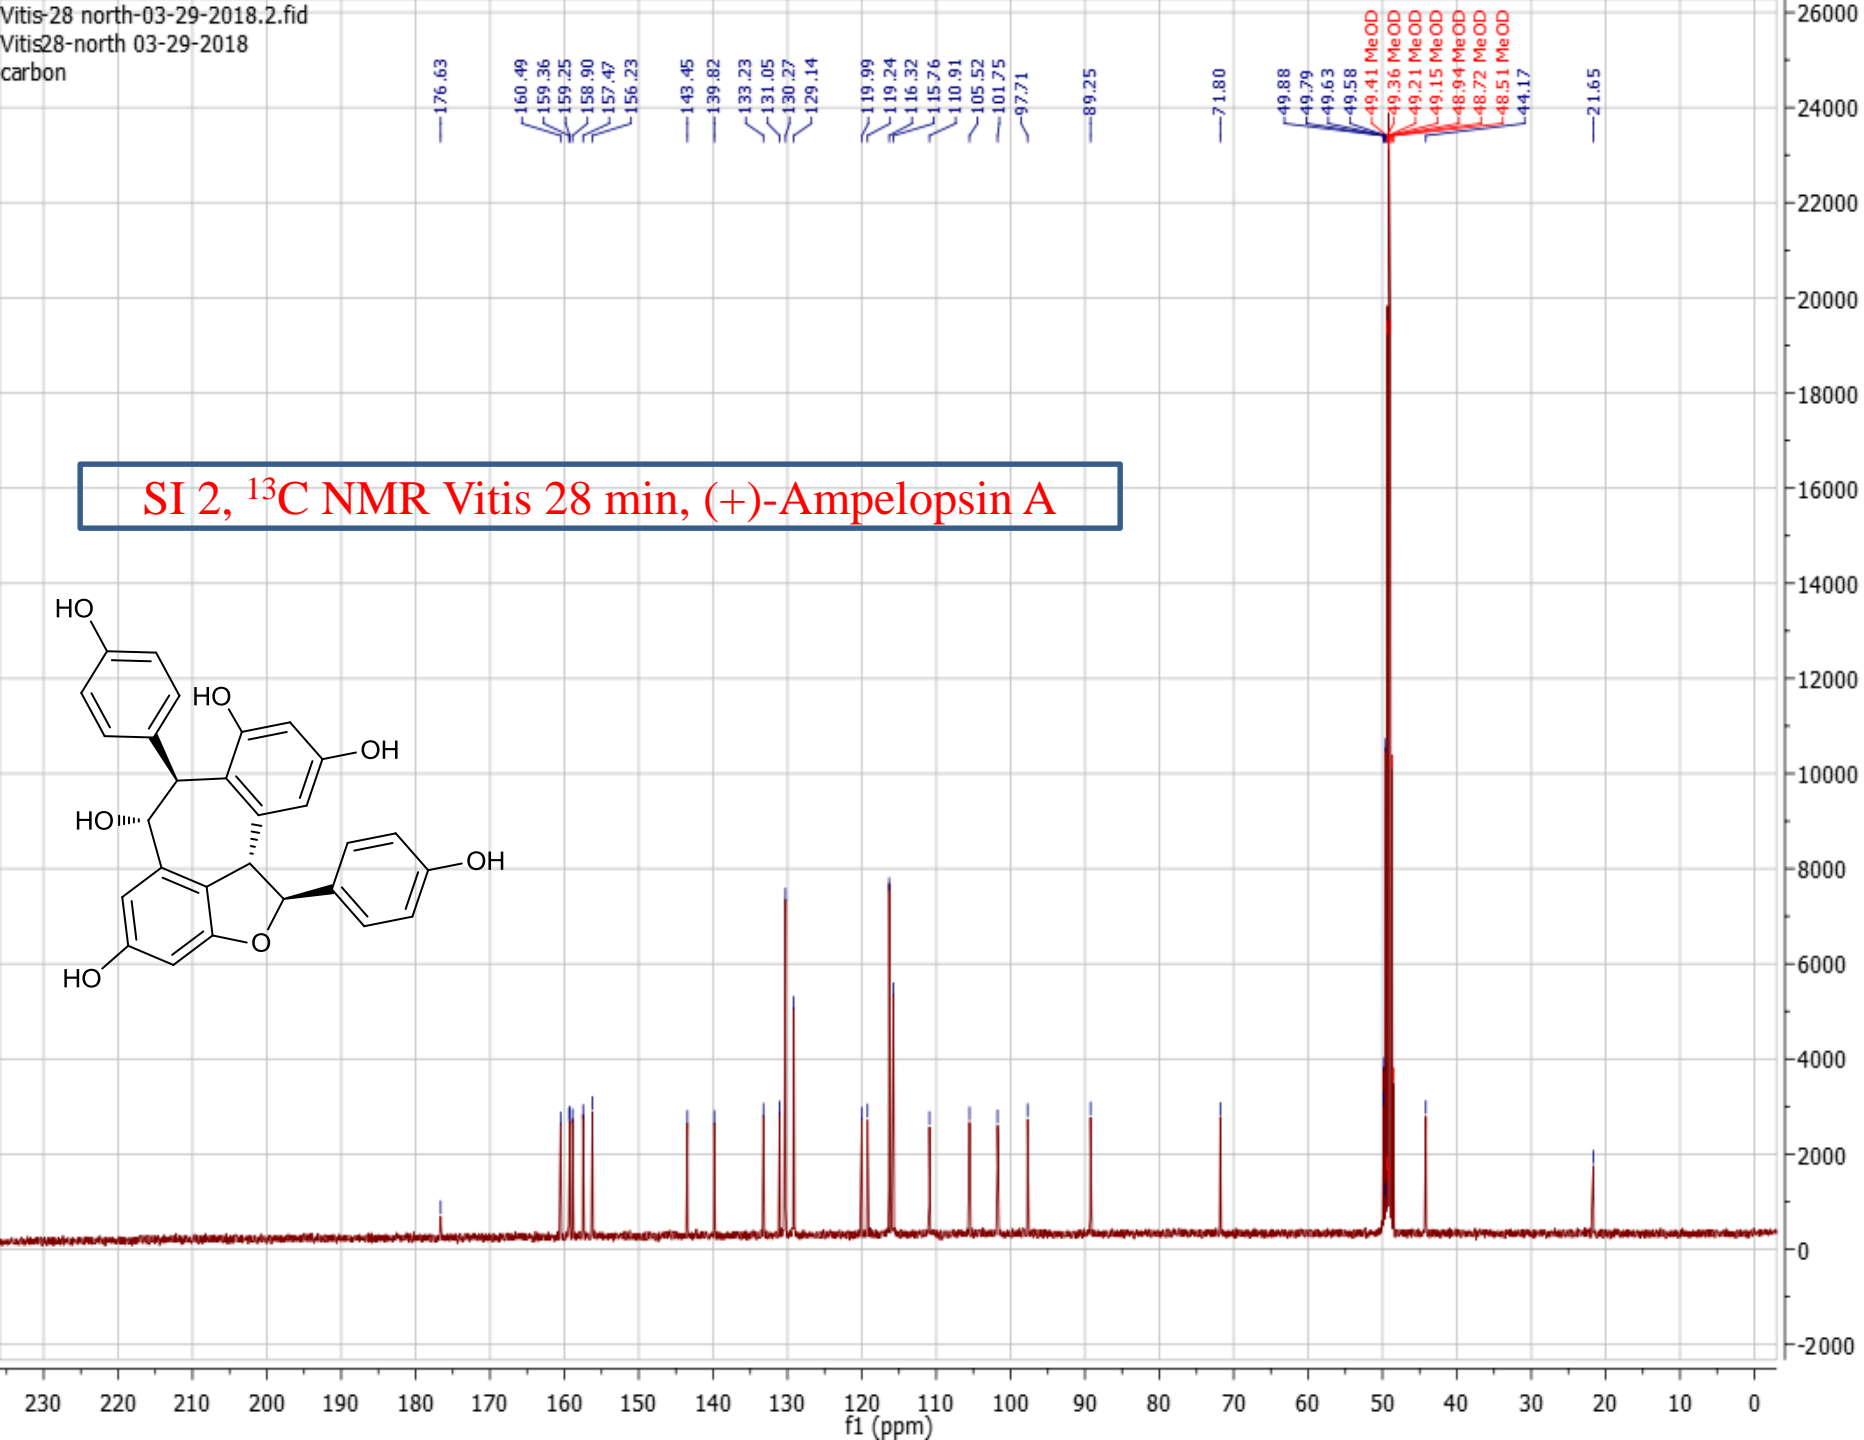

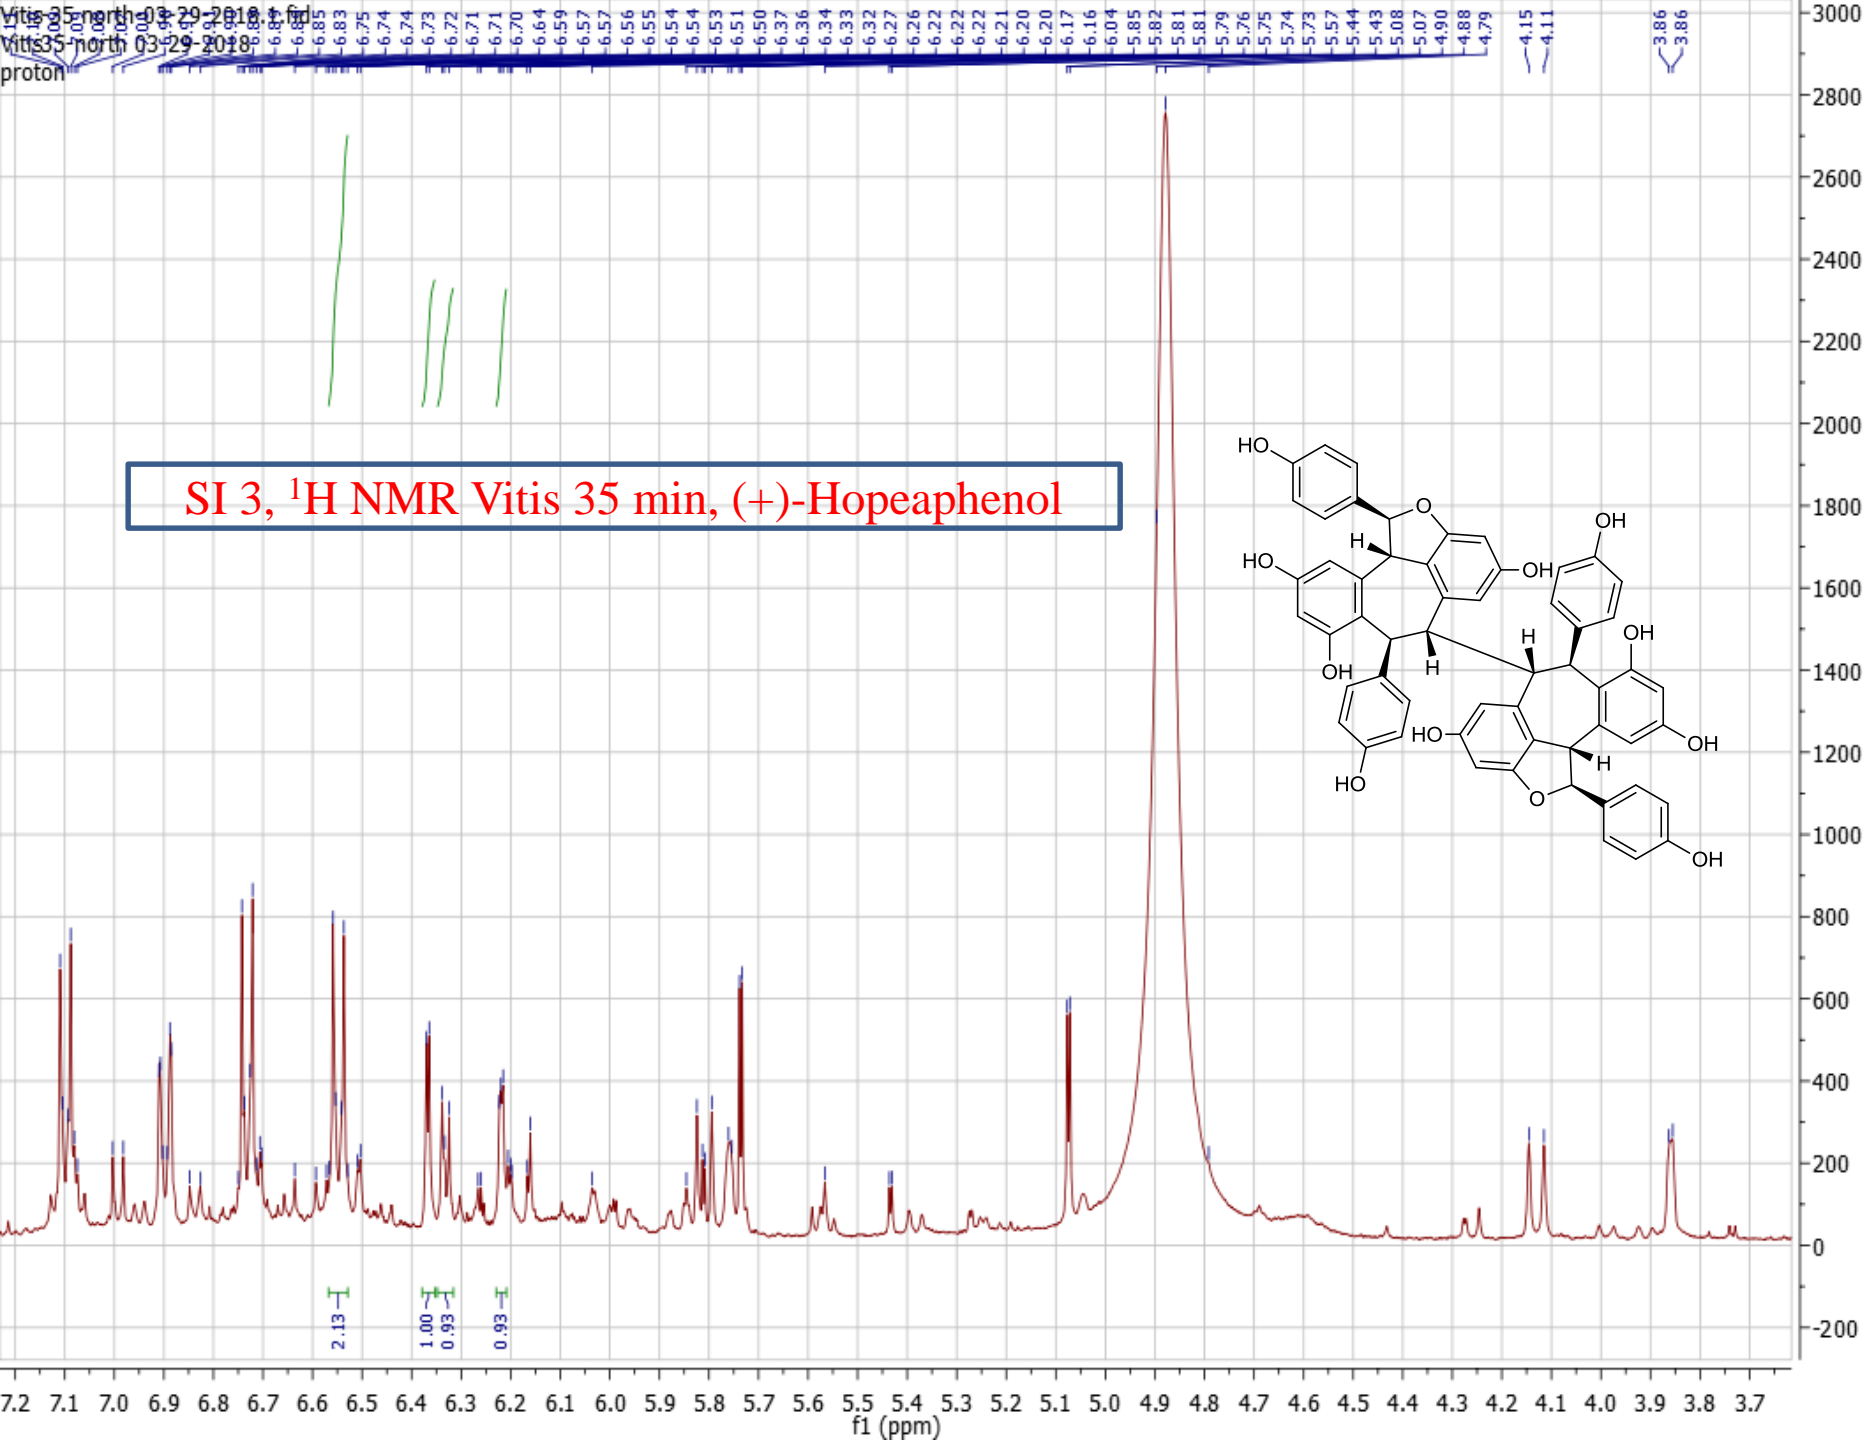

SI 4,  $^{13}\text{C}$  NMR Vitis 35 min, (+)-Hopeaphenol

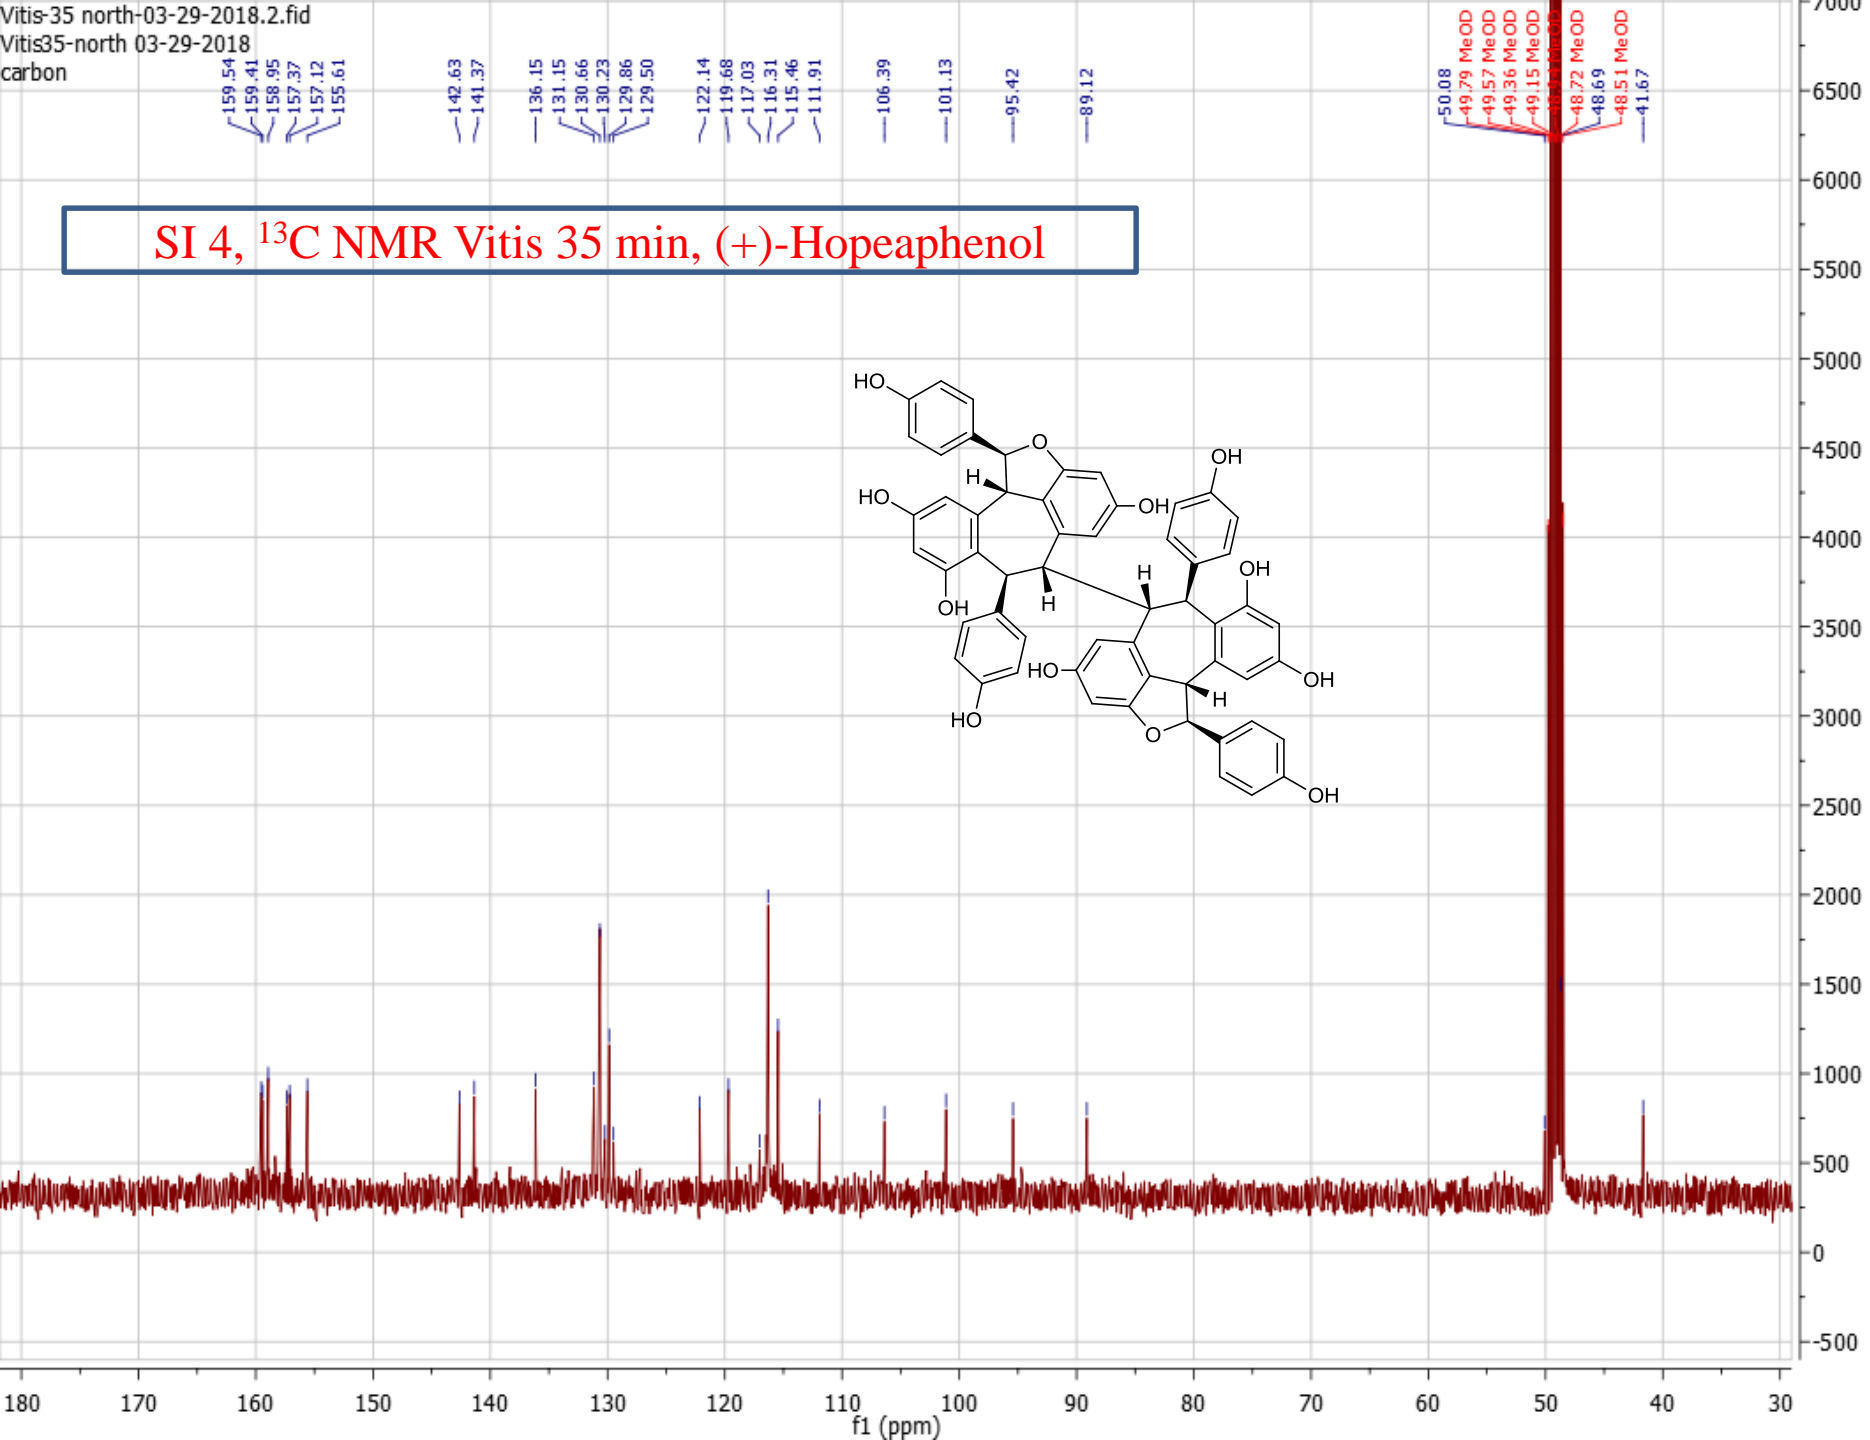

Vitis 38 min, 03-29-2018  
Vitis 38 min, 03-29-2018  
proton

6.821  
6.818  
6.800  
6.799  
6.777  
6.776  
6.775  
6.755  
6.750  
6.700  
6.699  
6.669  
6.668  
6.667  
6.666  
6.664  
6.649  
6.499  
6.344  
6.333  
6.255  
6.225  
6.224  
6.222  
6.222  
6.188  
6.188  
6.115  
6.115  
6.113  
6.113  
6.111  
6.110  
6.101  
6.011  
5.977  
5.966  
5.877  
5.844  
5.477  
5.477  
5.466  
5.366  
5.334  
5.330  
5.300  
5.299  
5.066  
4.311  
4.300  
4.188  
4.115

SI 5, <sup>1</sup>H NMR Vitis 38 min, (+)-Vitisin A

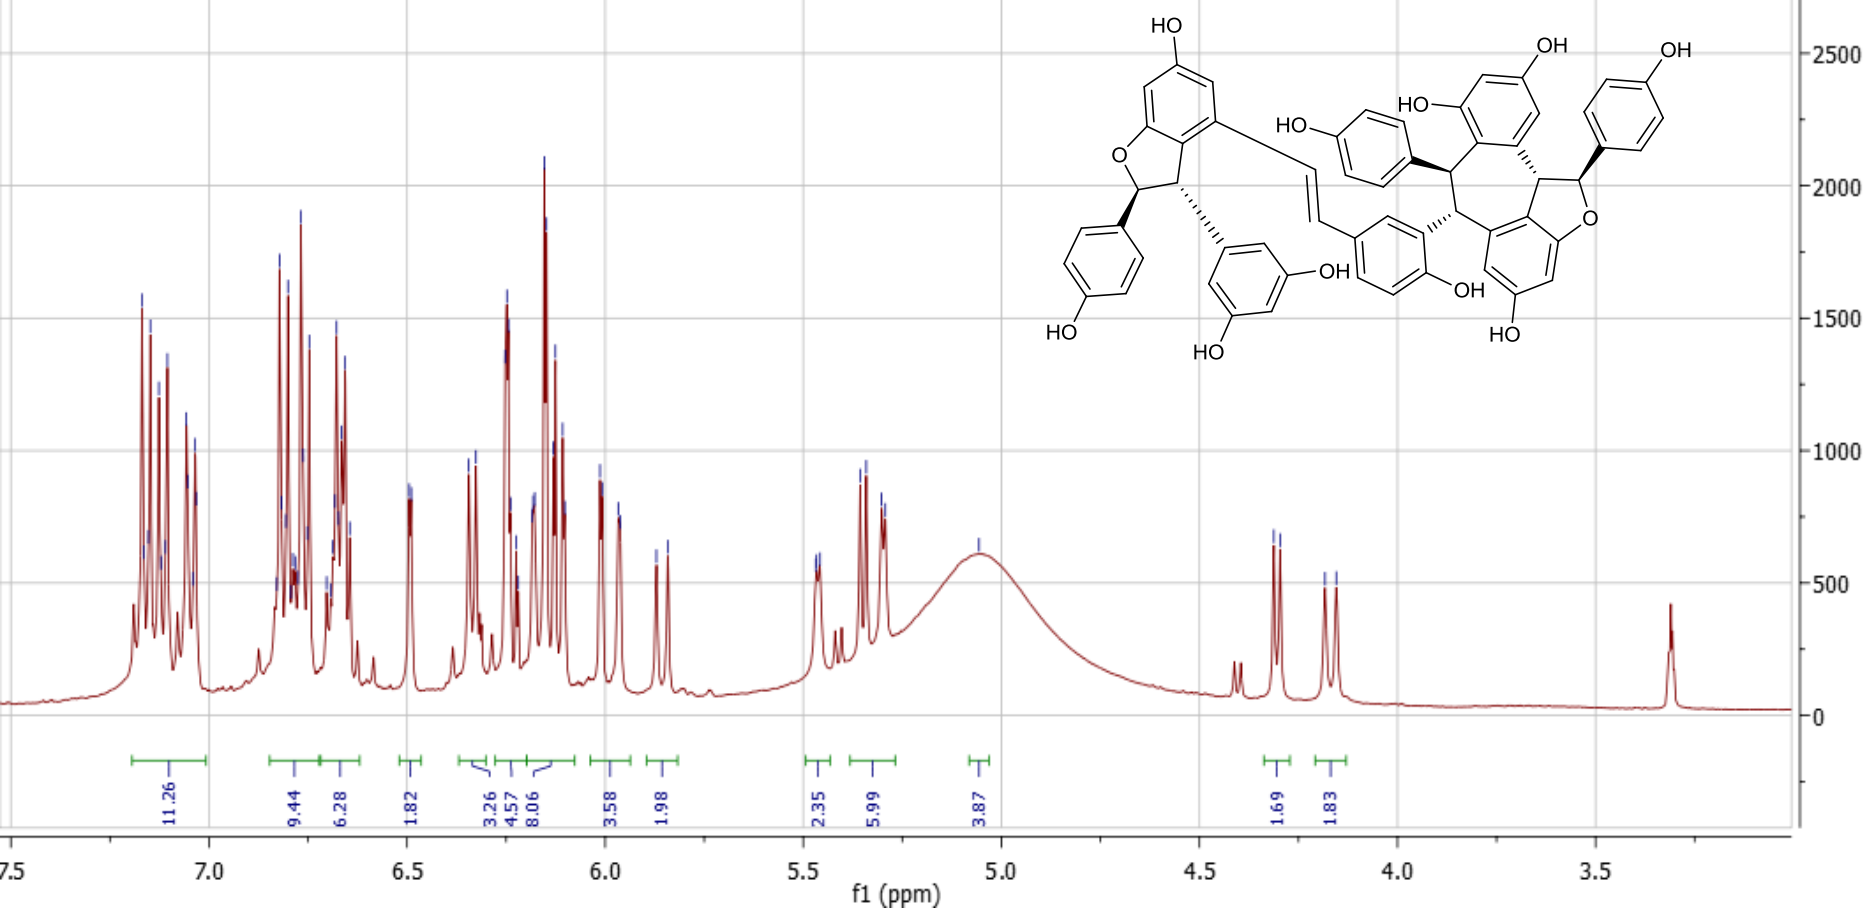

SI 6,  $^{13}\text{C}$  NMR Vitis 38 min, (+)- Vitisin A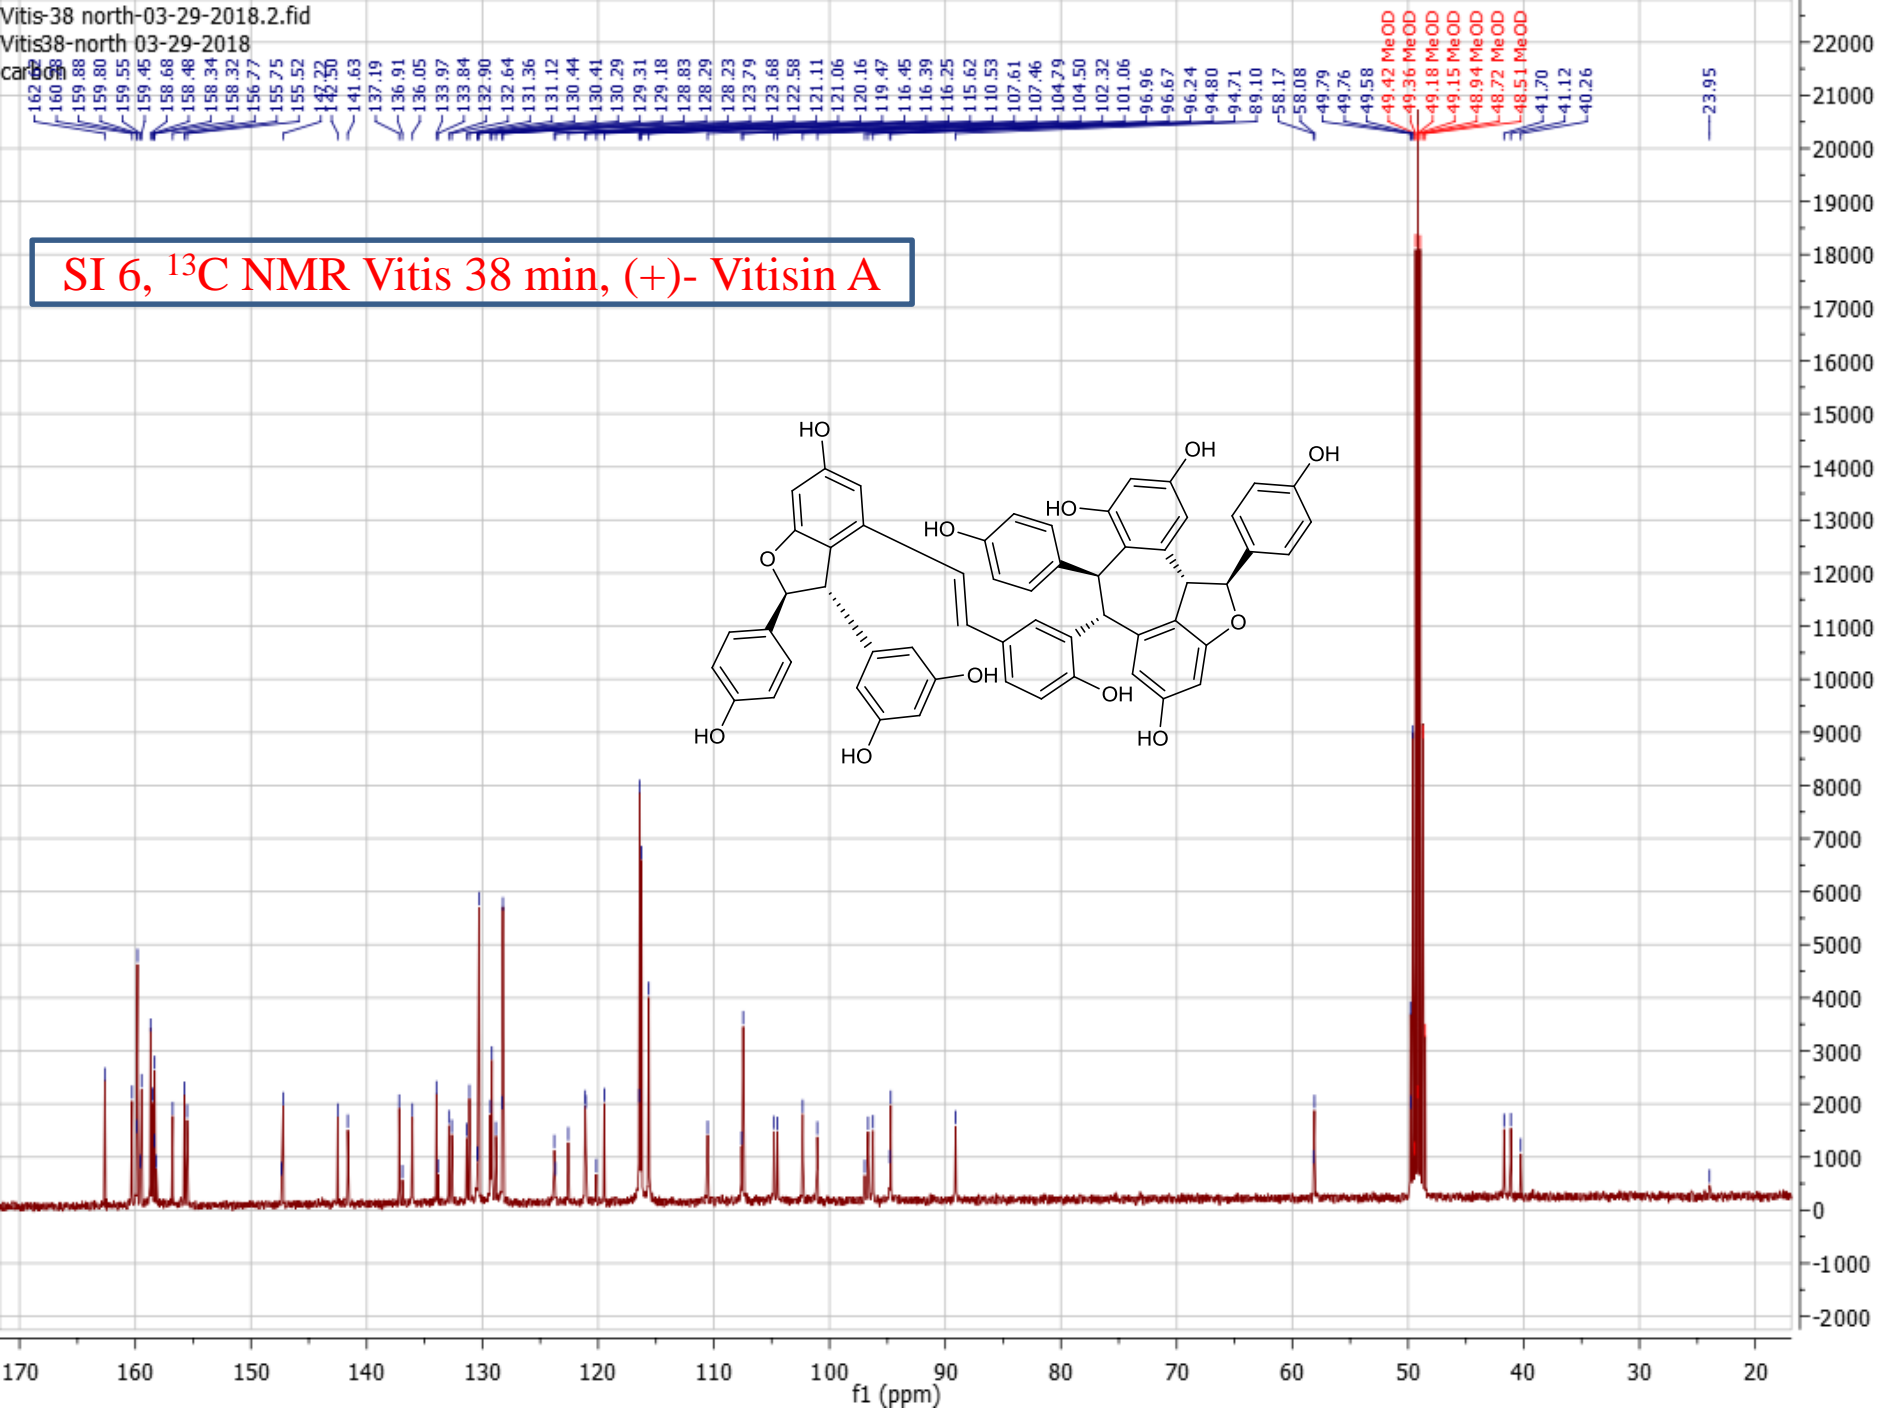



SI 7,  $^1\text{H}$  NMR Vitis 42 min, (+)- Vitisin B

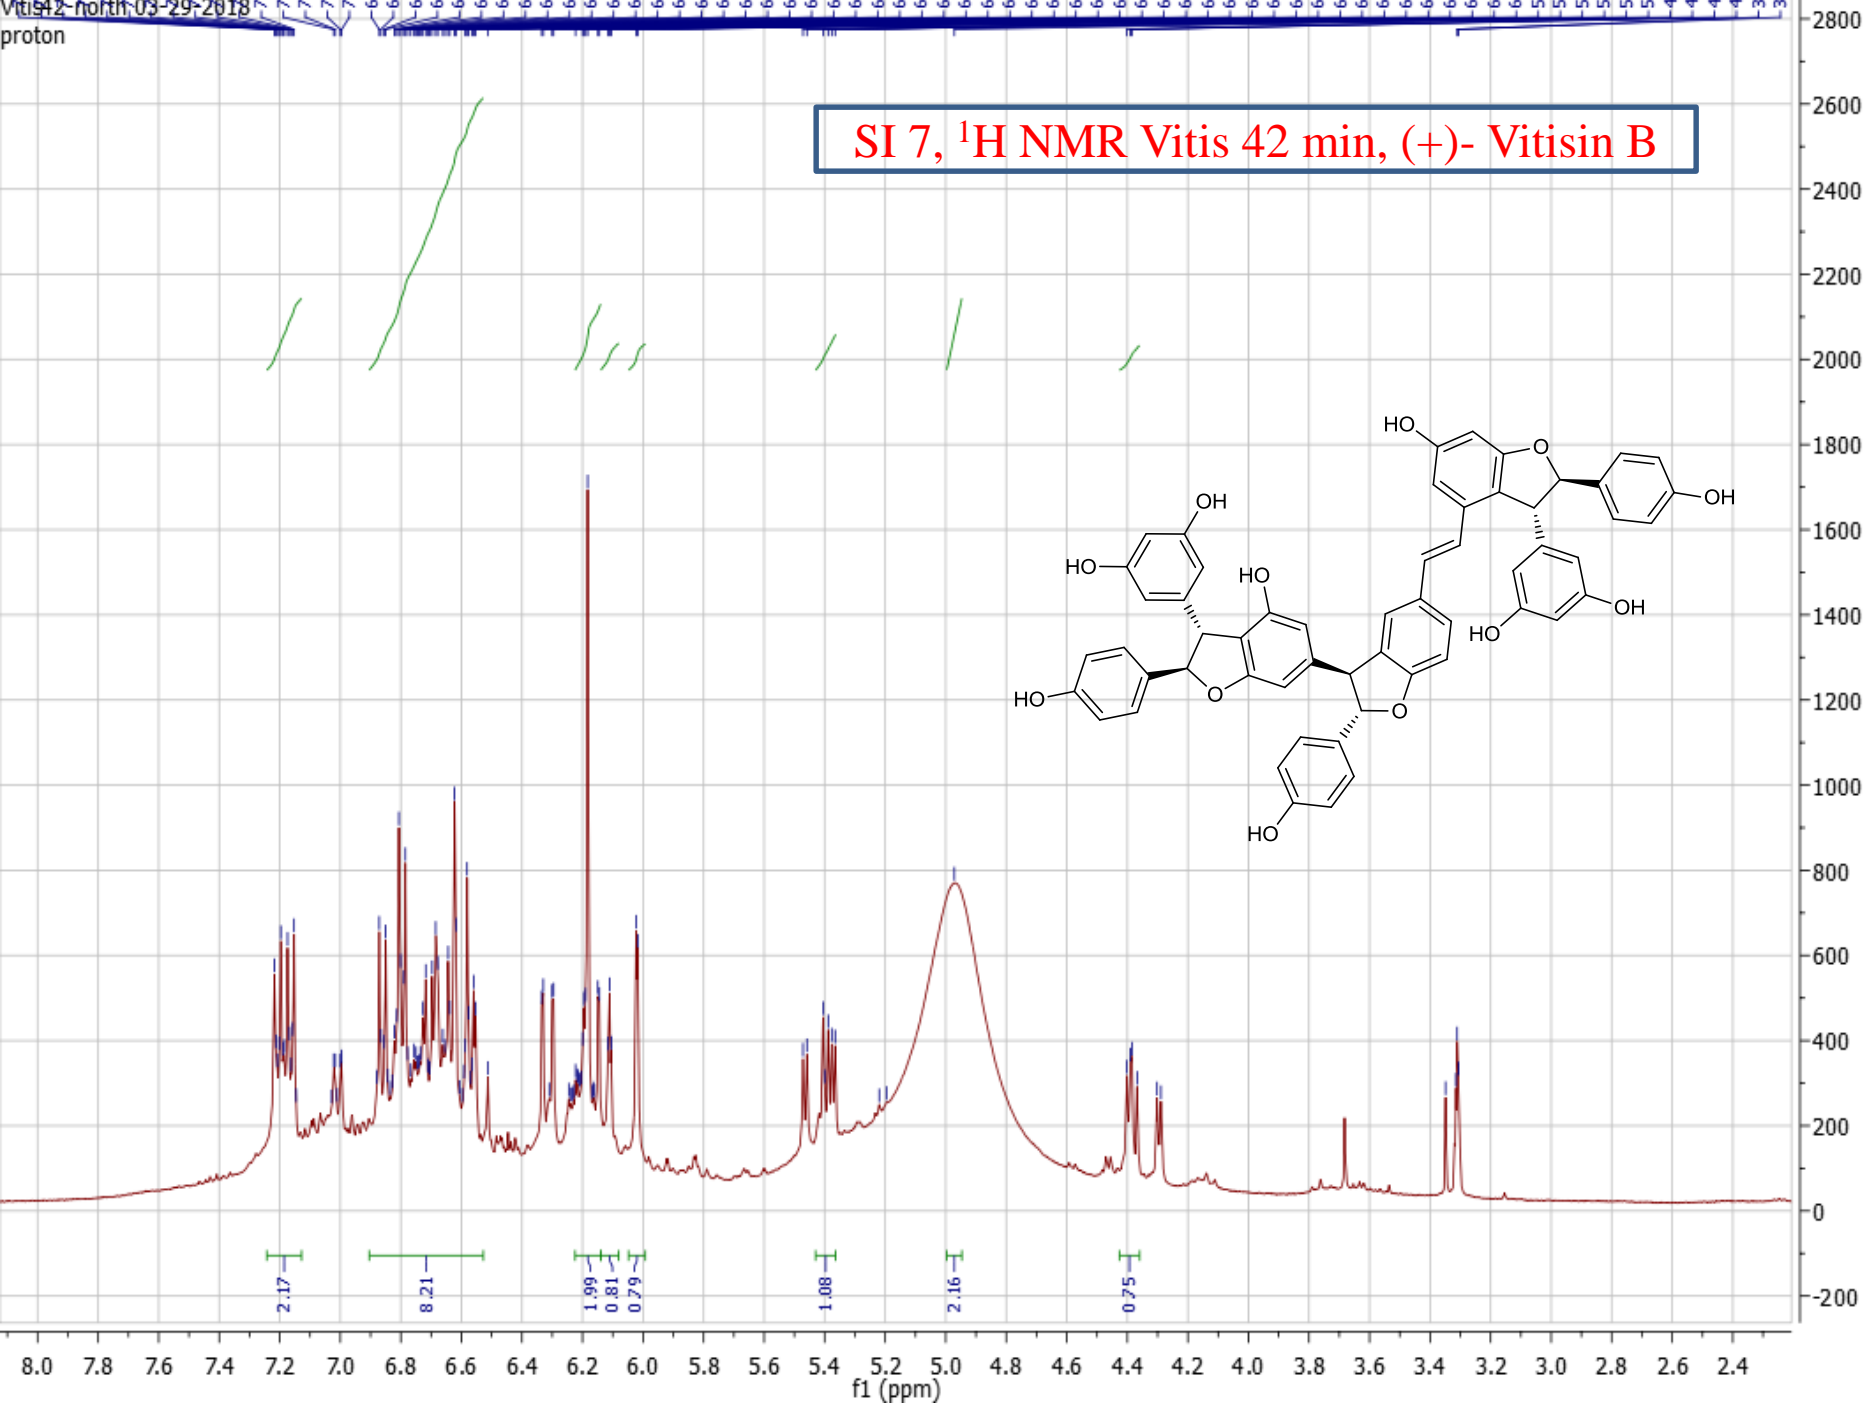

SI 8,  $^{13}\text{C}$  NMR Vitis 42 min, (+)- Vitisin B

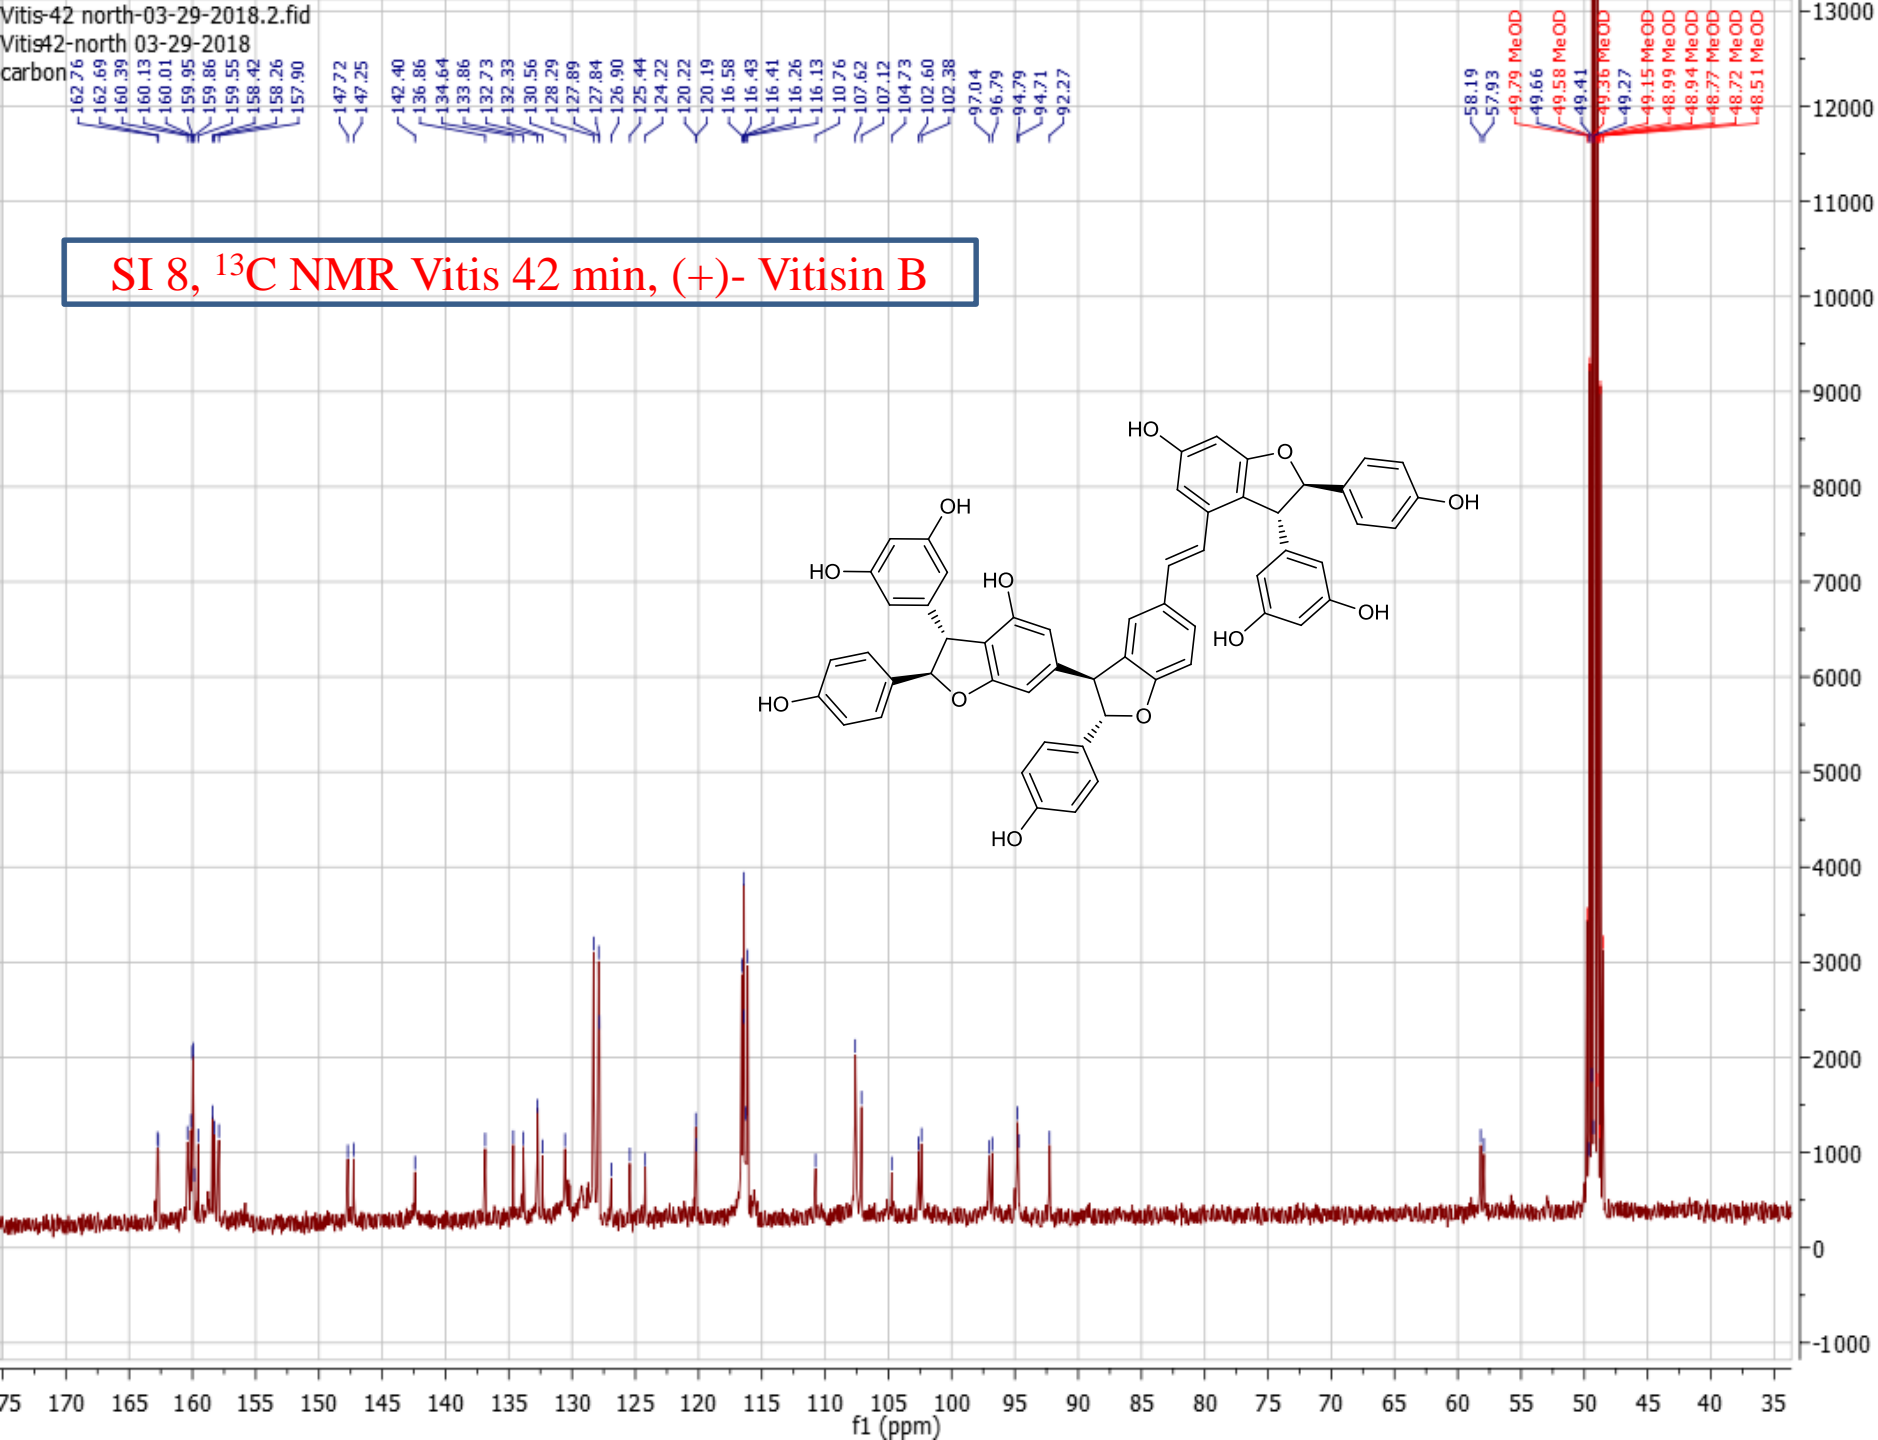

Supplement: s1 [file s1]
